# Supplementary material for: Exploration of anti-stress mechanisms in high temperature exposed juvenile golden cuttlefish (Sepia esculenta) based on transcriptome profiling
Source: Front Physiol. 2023 May 10;14:1189375. doi: 10.3389/fphys.2023.1189375 (PMC10206265; doi:10.3389/fphys.2023.1189375)
Supplement: Supplementary file 1 [file Table1.xlsx]

## Sheet: Sheet1
Gene name	Swissprot ID	C_0h	C_4h	C_24h	T_4h	T_24h
PSMA2	P25787	212.252	207.292	208.545	196.02	148.469
PSMA6	P60901	246.223	234.851	234.339	216.016	143.459
LAMC1	P11047	27.3669	45.4684	53.8196	68.9473	64.1001
MYLK	Q28824	154.374	177.375	230.307	78.6072	186.183
LGMN	Q9R0J8	340.114	353.921	619.902	201.419	696.484
PIK3R4	Q99570	12.1815	13.4877	13.8241	10.4773	12.3701
uncharacterized	Q06605	83.3192	79.3032	48.0583	39.7242	78.1907
UGT1A7C	Q6ZQM8	8.57567	13.5323	6.67012	7.17352	4.98875
UGT1A2	P70691	2.14677	3.94052	4.64137	7.54454	4.34554
CCND2	P30279	21.6181	18.7347	19.0996	15.6065	11.6375
CARNS1	D3KCC4	0.829553	0.704742	1.46707	1.56608	1.35719
WDR3	Q8BHB4	11.2915	10.256	8.98049	9.80826	5.98501
TAB2	Q5U303	8.21003	8.87814	8.93455	12.6909	11.6445
SRM	P19623	70.128	63.1326	54.91	56.5706	34.7783
MAP1LC3A	Q2HJ23	46.0369	47.8724	43.0443	40.6147	61.6394
CELA3B	P08861	20.4763	16.635	12.4156	16.1188	21.2408
HSP90AA1	P30946	2291.56	1546.82	996.59	3616.47	961.159
EXOSC6	Q6P0I8	23.6225	29.1706	18.4531	18.9438	14.1914
MAGI1	Q96QZ7	20.1047	19.9596	17.0923	20.4731	25.5488
PSMA5	Q9Z2U1	236.445	233.983	227.519	207.169	152.227
PAX5	Q02548	3.6817	4.53375	3.55094	2.46511	3.71156
CACNA1D	P27732	5.31262	6.21926	9.2706	10.046	13.7677
COL6A6	A6NMZ7	6.41116	10.2537	11.6137	6.08582	14.2075
PSMD12	Q9D8W5	185.398	193.264	220.428	197.354	166.265
COL6A3	P12111	81.9208	83.8302	77.9045	75.3856	46.3726
COL6A4	A2AX52	98.9094	95.3674	122.398	108.882	66.5036
CDK9	P50750	12.7739	10.7324	13.0825	16.792	16.9381
NAGS	Q8N159	8.08042	6.6591	7.89444	13.3981	8.60758
PSMA8	Q9CWH6	175.654	169.457	198.452	172.491	132.094
PML	P29590	14.1909	13.2315	11.0941	8.50837	10.1858
PRKCD	P09215	1.66275	1.95095	2.00554	3.47159	2.65445
EXOSC7	Q15024	42.6307	37.4888	38.6191	41.0256	25.0159
SHC1	Q5M824	3.42976	3.09526	3.85172	5.94987	5.53678
CREB3L3	Q68CJ9	56.4807	50.5711	57.0222	70.5555	58.5488
PSMB6	Q3MHN0	166.912	165.294	168.915	159.533	113.69
ODC1	P27118	23.8652	18.973	19.6086	27.1399	14.2663
GADD45G	Q9WTQ7	42.0721	42.2707	47.8756	62.0228	65.9234
NOS2	Q90703	0.201286	0.154995	0.657144	0.634968	0.372958
NLK	D3ZSZ3	4.85364	5.52508	5.91325	9.48001	5.41886
CYP3A11	Q64459	4.40585	4.95353	6.51139	3.05873	5.08824
WDR61	Q6P5M2	49.9777	46.6684	46.7086	50.4123	34.9285
PSMB2	Q5E9K0	154.2	144.232	142.593	131.956	95.1161
PAX7	P23759	6.7619	7.68702	8.13585	5.36359	4.70681
XRN1	P97789	7.25132	8.54187	9.90954	11.4875	10.7434
DOT1L	Q8TEK3	6.78448	5.92714	5.53563	4.02129	4.35071
HYOU1	Q9Y4L1	61.8347	52.4229	38.5295	77.6435	44.104
PRMT1	Q63009	515.405	499.875	503.87	493.364	363.278
KIDINS220	Q9EQG6	15.9945	17.6661	22.3022	22.9664	26.3835
SUGT1	B0BN85	36.4408	35.4288	27.8285	56.5976	29.9643
NOS1	P29475	3.92651	3.88555	3.49349	4.67797	5.3046
ITPR1	Q14643	1.11125	0.765958	0.941189	1.70352	0.797558
PSMB5	P28075	207.244	216.075	240.113	205.437	169.399
SEC24B	O95487	9.37974	9.33651	9.74046	13.5416	10.8219
DNAJA1	P31689	438.59	395.309	282.949	520.799	248.239
HSD17B2	P51658	1.71834	1.65283	1.39473	4.13531	1.67895
PSMA4	P25789	192.703	171.672	189.365	170.279	123.639
COL6A5	A8TX70	0.6728	0.743544	0.883475	2.28126	1.54801
LAMA2	P24043	11.6562	14.1731	15.4893	11.07	12.5579
PSMC3	P17980	161.839	166.607	174.579	157.153	125.71
COL15A1	O35206	62.7959	86.8537	100.82	133.258	95.0958
PSMD1	Q99460	101.786	110.277	100.683	103.28	73.9129
UTP6	Q8VCY6	9.07241	8.91147	9.36585	8.18318	6.40697
PLA2G16	P53817	5.14758	5.60389	7.16606	12.3783	12.067
BCL2L1	P53563	87.1474	94.4934	96.4687	141.475	100.718
PSMD6	Q99JI4	149.775	151.262	148.549	146.645	109.231
FRAS1	Q86XX4	1.28915	1.84905	2.0689	2.80608	1.87177
ZEB1	Q62947	6.58066	5.58273	4.42935	5.26733	7.18359
HDAC4	P83038	5.80486	5.78839	8.74054	9.78544	9.40754
DNAJC10	Q8IXB1	37.0378	36.8805	30.7244	60.0584	33.9082
PSME3	P61291	122.075	109.633	105.591	114.904	76.7123
PIK3R1	P23727	8.59027	11.0715	8.91976	15.2929	11.1625
MPHOSPH10	Q810V0	15.7027	12.9194	13.0632	10.7049	8.99721
EIF2S1	Q7ZTK4	201.275	177.035	153.846	164.392	103.398
CTSB	A1E295	530.83	458.372	609.925	329.001	437.08
TRAM1L1	Q6DED0	9.17458	10.9687	10.3156	15.8005	8.80792
COL6A6	Q8C6K9	30.749	42.023	76.8134	21.3398	91.281
GAR1	Q9CY66	81.0234	66.591	70.0051	67.7141	43.8823
MEF2A	A2VDZ3	1.16779	1.97276	2.08007	3.9453	3.17841
PSMD3	Q2KJ46	90.2244	92.8789	107.568	94.1145	78.8862
HSPA8	P63018	1592.04	1322.38	863.812	1979.82	667.99
STUB1	Q9UNE7	7.0429	8.7205	10.4064	7.54209	6.83639
PARN	O95453	45.9496	47.6053	48.5974	37.5196	31.2976
SIL1	Q6NUA7	16.2139	13.1556	9.98719	38.099	20.5519
DHX36	Q9H2U1	9.46813	10.7261	9.33695	7.30145	7.66135
PSMD7	Q3ZBD0	161.012	169.208	172.706	165.935	117.686
BNIP3	Q32KN2	96.8071	106.123	126.128	80.5535	153.238
FREM2	Q5SZK8	1.50408	1.84913	2.66701	2.97668	2.31441
MOGS	Q13724	29.4206	27.2084	27.0719	34.7906	29.4471
EIF5A	P10160	1605.72	1477.26	1378.97	1471.88	1015.87
PSMD2	Q5R9I6	107.468	112.102	109.001	110.19	79.5253
LSM7	Q9UK45	23.3176	20.476	16.6617	9.2638	11.9529
PPP5C	P53042	54.3367	54.7167	50.5629	50.806	35.0666
PSMD8	Q5RE15	199.54	204.215	204.47	193.676	153.679
KDM6A	O15550	6.47528	7.58862	9.07596	12.53	10.4314
COL12A1	Q60847	0.531376	0.915113	0.761126	2.04791	0.479747
COL12A1	Q99715	11.2444	10.9877	17.2444	16.0899	16.0021
NOS2	P35228	23.786	44.074	55.6398	31.1463	27.9361
